# Supplementary material for: 2D-GaN/AlN Multiple Quantum Disks/Quantum Well Heterostructures for High-Power Electron-Beam Pumped UVC Emitters
Source: MDPI journal article supplement (doi:10.3390/nano13061077), 2023-03-16
Supplement: s1 [file s1]

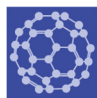

### 1. Estimation of excess Ga and Al accumulated during QW growth under different Me-rich conditions.

During the growth of MQW structures under Me-rich conditions with various Ga/N<sub>2</sub>\* flux ratio the following typical growth parameters were used. MQW-2.2-S structure was grown at the growth fluxes of  $Ga=1.00$  ML/s,  $N_2^*=0.464$  ML/s and the duration of the growth of QW with a nominal thickness of  $1.5\text{ML}$   $t_{QW}=3.2\text{s}$ . Substrate temperature was  $T_s=691^\circ\text{C}$  and in accordance with [1] the equilibrium Ga desorption flux at this temperature was estimated as  $Ga^{DE} = 0.22\text{ML/s}$ . These fluxes provided the strong Ga-rich growth conditions of GaN:  $(Ga - N_2^*) > Ga^{DE}$  and the effective Ga-desorption flux  $Ga^D = Ga^{DE}$ . Thus, the excess Ga accumulated during the QW growth equals

$$E^{Ga} = (Ga - Ga^D - N_2^*) \cdot t_{QW} = 1.0\text{ML} \quad (S1)$$

MQW-1.1-S structure was grown at the growth fluxes of  $Ga = 0.50$  ML/s,  $N_2^* = 0.450\text{ML/s}$  and the duration of the growth of QW with a nominal thickness of  $1.5\text{ML}$   $t_{QW}=3.1\text{s}$ . At the same substrate temperature ( $691^\circ\text{C}$ ), the fluxes used ensured the weak Ga-rich conditions  $(Ga - N_2^*) < Ga^{DE}$ , at which the Ga desorption flux was equal to  $Ga^D = (Ga - N_2^*) = 0.5 - 0.45 = 0.05$  ML/s and excess Ga did not accumulate.

### 2. Calculation of the stress in the $400\times\{\text{GaN}_{1.5}/\text{AlN}_{16}\}$ MQW structure coherently grown on AlN layer

An average Al-content ( $x$ ) in the  $400\times\{\text{GaN}_{1.5}/\text{AlN}_{16}\}$  MQW structure was calculated by the equation  $x=d_{BL}/(d_{QW} + d_{BL})$ , which at the used thicknesses  $d_{GaN}=1.5\text{ML}$  and  $d_{AlN}=16$  gave the value  $x=0.91$ . Vegard's law was used for the calculations of the a-lattice constant of the equivalent ternary alloy as  $a_{\text{AlGaN}}=a_{\text{AlN}} \cdot x + a_{\text{GaN}} \cdot (1-x)=3.118 \text{ \AA}$ , where a-lattice constants for binary alloys were  $a_{\text{AlN}} = 3.111 \text{ \AA}$ ,  $a_{\text{GaN}} = 3.189 \text{ \AA}$  [2]. Using these data, the biaxial strain in the coherently grown  $\text{Al}_x\text{Ga}_{1-x}\text{N}/\text{AlN}$  heterostructure was estimated as  $\epsilon_{xx} = (a_{\text{AlN}} - a_{\text{AlGaN}})/a_{\text{AlGaN}} = -0.00221$ . In the same way, the biaxial elastic modulus of  $\text{Al}_x\text{Ga}_{1-x}\text{N}$  (was calculated as  $M_{\text{AlGaN}} = M_{\text{AlN}}x + M_{\text{GaN}}(1-x) = 472 \text{ GPa}$  with the following reference data for biaxial elastic modulus AlN and GaN: and  $M_{\text{AlN}} = 471 \text{ GPa}$  [3],  $M_{\text{GaN}} = 479 \text{ GPa}$  [4], which was used to estimate the biaxial stress in this coherently grown heterostructure as  $\sigma_{xx} = M_{\text{AlGaN}} \times \epsilon_{xx} = 1.0 \text{ GPa}$ .

### 3. The SEM image of this structure with clearly visible cracks

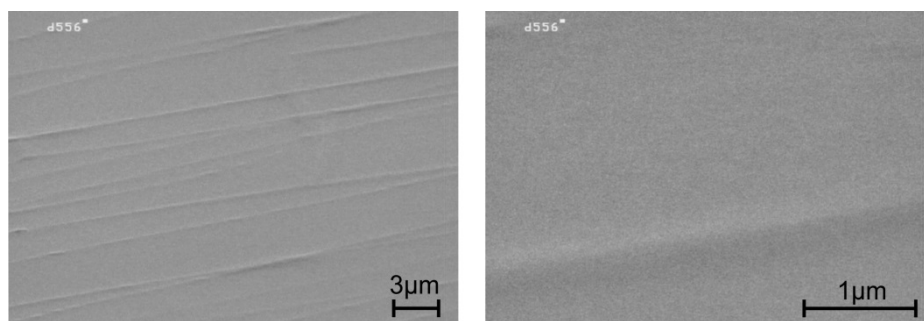

**Figure S1.** SEM images of structure MQW-2.2-D<sub>1</sub> obtained at various magnifications.

#### 4. The (105) RSMs of $\{\text{GaN}_{1.5}/\text{AlN}_{16}\}$ ( $N=50,100$ ) MQW structures grown at various $\text{Ga}/\text{N}_2^*$ flux ratio

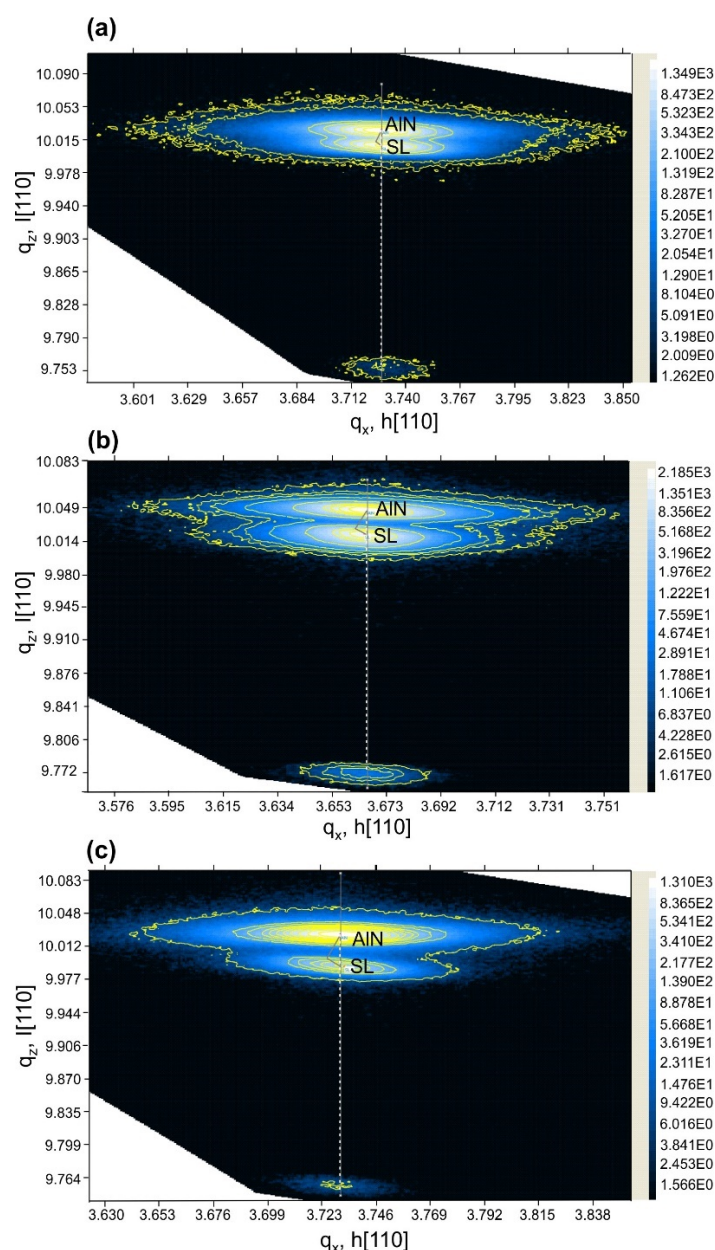

**Figure S2.** The (105) RSMs of  $N \times \{\text{GaN}_{1.5}/\text{AlN}_{16}\}$  structures (a) 400×QW-1.5-1.1-S grown under  $\text{Ga}/\text{N}_2^* = 1.1$ ; (b) 400×QW-1.5-2.2-S (c) 400×QW-1.5-2.2-S (both (b) and (c) were grown under  $\text{Ga}/\text{N}_2^* = 2.2$ ).

1. Jmerik, V.N.; Nechaev, D.V.; Ivanov, S.V. Kinetics of metal-rich PA molecular beam epitaxy of AlGaN heterostructures for mid-UV photonics. In *Molecular Beam Epitaxy: From Research to Mass Production*, 2nd ed.; Henini, M., Ed.; Elsevier Inc.: Amsterdam, The Netherlands; Oxford, UK; Cambridge, MA, USA, 2018; pp. 135–179. <https://doi.org/10.1016/B978-0-12-812136-8.00008-6>.
2. Ferreyra, R.A.; Zhu, C.; Teke, A.; Morkoç, H. Group III Nitrides. In *Springer Handbook of Electronic and Photonic Materials*; Kasap, S., Capper, P., Eds.; Springer International Publishing: Cham, Switzerland, 2017. [https://doi.org/10.1007/978-3-319-48933-9\\_31](https://doi.org/10.1007/978-3-319-48933-9_31).
3. Wright, A. Elastic properties of zinc-blende and wurtzite AlN, GaN, and InN. *J. Appl. Phys.* **1997**, *82*, 2833–2839. <https://doi.org/10.1063/1.366114>.
4. Polian, A.; Grimsditch, M.; Grzegory, I. Elastic constants of gallium nitride. *J. Appl. Phys.* **1996**, *79*, 3343–3344. <https://doi.org/10.1063/1.361236>.
